# Supplementary material for: The Potential of Campanula takesimana Callus Extract to Enhance Skin Barrier Function
Source: MDPI journal article supplement (doi:10.3390/ijms242417333), 2023-12-11
Supplement: s1 [file s1]

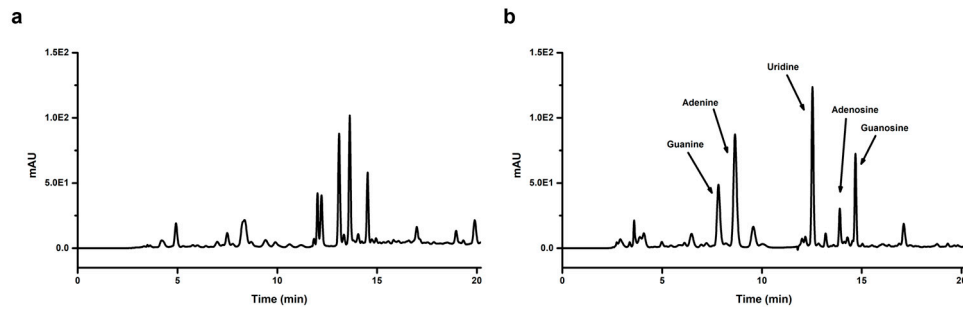

**Figure S1. HPLC chromatograms of the *C. takesimana* leaf and callus extract**  
(a) *C. takesimana* leaf extract. (b) *C. takesimana* callus extract.

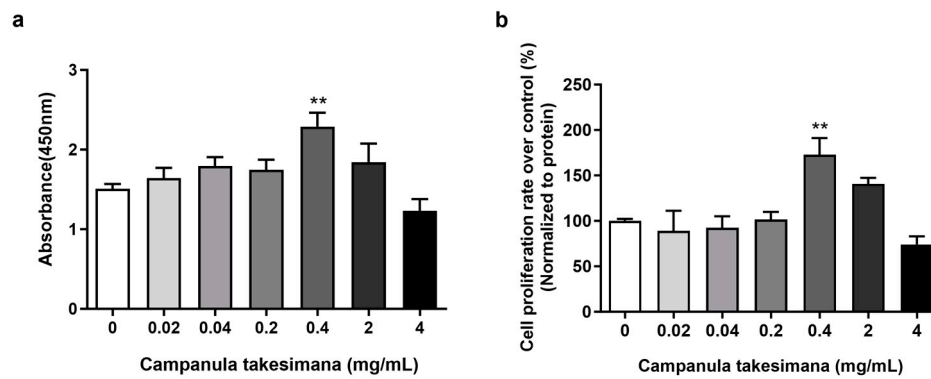

**Figure S2. The effect of *C. takesimana* callus extract on cell viability and proliferation**  
(a) Absorbance of NHEKs treated with callus extract (0-4 mg/mL) was measured using MTT assay. (b) Cell proliferation rate was analyzed using EZ-Cytox Plus assay kit. All data are shown as mean  $\pm$  SD and analyzed by one-way ANOVA analysis followed by Tukey's multiple comparisons tests ( $n = 4$  per group, \*\* $p < 0.01$ ). \* $p < 0.05$

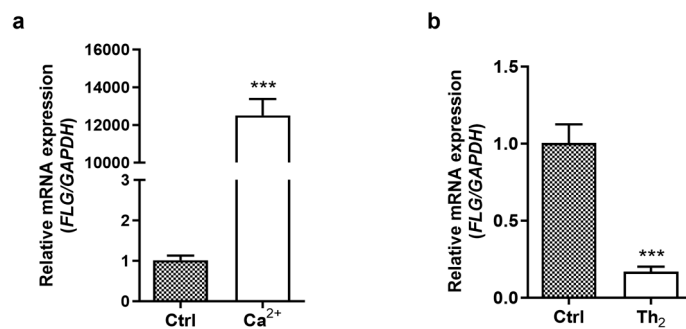

**Figure S3. The effect of IL-4/IL-13 cytokines on *FLG* expression in NHEKs**  
(a, b) The mRNA expression of *FLG* was measured by qRT-PCR. (a) NHEKs were treated with CaCl<sub>2</sub> to induce the differentiation of the cells. (b) NHEKs were treated with CaCl<sub>2</sub> in the presence or absence of IL-4/IL-13 for 24h. All data are shown as mean  $\pm$  SD and analyzed by an unpaired t-test ( $n = 4$  per group, \*\*\* $p < 0.001$ ).

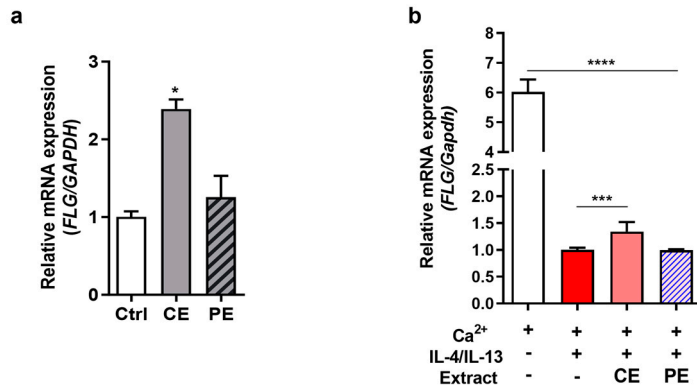

**Figure S4. *C. takesimana* callus extract, but not *C. takesimana* plant extract, regulates the expression of *FLG***

(a, b) Callus extract or plant extract was applied to the culture medium for 5 days with or without IL-4/IL-13 in the presence of calcium chloride. The expression of *FLG* was detected by qRT-PCR. All data were analyzed by one-way ANOVA analysis followed by Tukey's multiple comparisons test and shown as the mean  $\pm$  SD (n=4 per group, \* $p$  < 0.05, \*\* $p$  < 0.01, \*\*\* $p$  < 0.001, and \*\*\*\* $p$  < 0.0001).
